# Supplementary material for: Nanotexturation-induced extreme wettability of an elemental tellurium coating
Source: Royal Society of Chemistry journal article supplement (doi:10.1039/c1jm14664e), 2011-12-19
Supplement: c1jm14664e.pdf [file c1jm14664e.pdf]

**Supporting Information:**

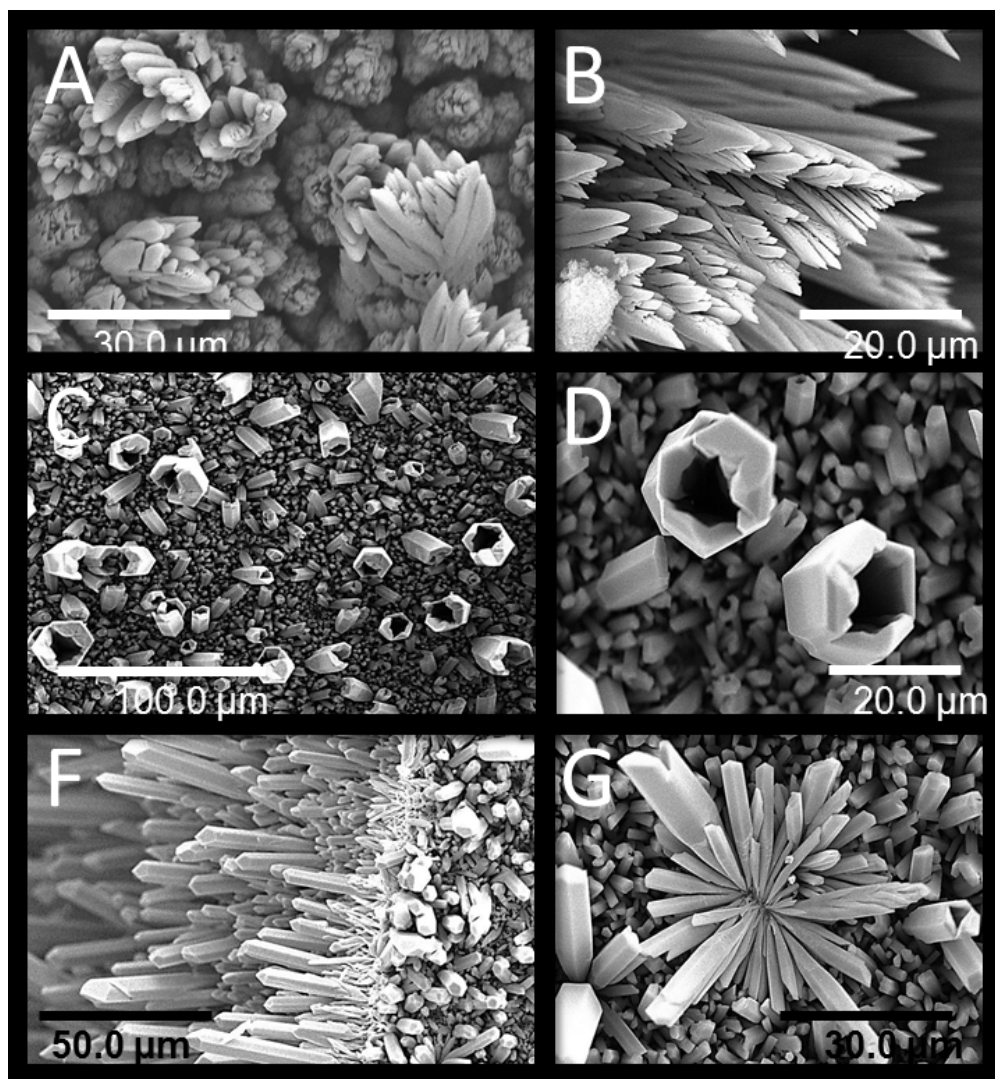

**Figure S1.** SEM images of Te nanostructures deposited on different substrates. A,B) Si<100>coated with 300 nm SiO<sub>2</sub>; C,D) ITO-coated glass; F,G) Si<100>

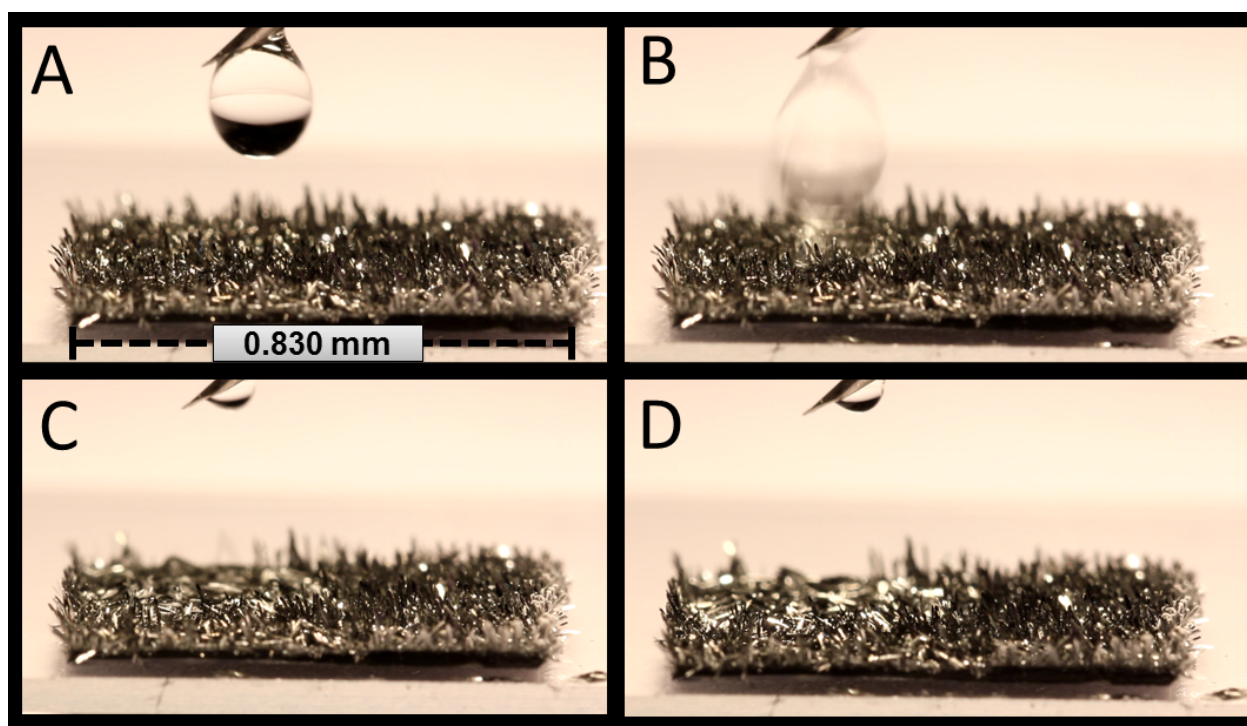

**Figure S2.** A-D) The progression of images demonstrates the complete spreading of water on a hierarchically textured Te coating deposited onto Si<100>. Complete spreading was achieved within 100 ms in this instance.
